# Supplementary material
Source: PubMed Central journal article supplement (PMC7921895)
Supplement: jamapediatr-e205086-s001.pdf [file jamapediatr-e205086-s001.pdf]

## Supplementary Online Content

Ronchi A, Pietrasanta C, Zavattoni M, et al. Evaluation of rooming-in practice for neonates born to mothers with severe acute respiratory syndrome coronavirus 2 infection in Italy. *JAMA Pediatr*. Published online December 7, 2020. doi:10.1001/jamapediatrics.2020.5086

**eAppendix 1.** Indications for Mothers With Novel Coronavirus Infection Hospitalized With Their Baby

**eAppendix 2.** Hospital Discharge Indications for Parents Affected by Novel Coronavirus Infection

This supplementary material has been provided by the authors to give readers additional information about their work.

## **eAppendix 1. Indications for mothers with novel coronavirus infection hospitalized with their baby**

### **How to protect your baby from infection**

- ✚ wash your hands thoroughly and frequently with warm, soapy water or alcohol-based gel. Always wash them before caring for your baby, before touching him/her, nursing him/her and before touching objects intended for his care
- ✚ when in your room, always wear a surgical mask that perfectly covers your nose and mouth, especially when you take care of your baby. Wrap him/her in a clean cloth to avoid contact with potentially infected clothing
- ✚ keep your baby's bed 2 meters away from you
- ✚ continue to breastfeed your baby, wearing a surgical mask that perfectly covers your nose and mouth during breastfeeding, and wrap him/her in a clean cloth after washing your hands thoroughly
- ✚ avoid visits to the room of any family member
- ✚ in case you have doubts, know that the health personnel (neonatologists, nurses, midwives) are at your disposal at any time

## **eAppendix 2. Hospital discharge indications for parents affected by novel coronavirus infection**

### **How to protect your baby from infection at home**

- ✚ wash your hands thoroughly and frequently with warm, soapy water or alcohol-based gel. Always wash them before caring for your baby, before touching him/her, nursing him/her and before touching objects intended for his care
- ✚ if possible, delegate the care of your baby to a healthy person for at least 14 days from the beginning of your symptoms, and share the environment with him/her as little as possible. If you don't have the opportunity to delegate the care of your baby, wear a surgical mask that perfectly covers your nose and mouth when you take care of him/her, or when you stay in the same room. Wrap him/her in a clean cloth to avoid contact with potentially infected clothing. If you stay in the same room, make sure that your baby's bed is 2 meters away from you
- ✚ for mothers: continue breastfeeding your baby, wearing a surgical mask that perfectly covers the nose and mouth during breastfeeding, and wrapping him/her in a clean cloth after washing your hands thoroughly
- ✚ ventilate the rooms frequently
- ✚ avoid visits from relatives and friends
- ✚ avoid going outside with your infant, except for the outpatient check-up that has been planned for you two weeks after being discharged, in a dedicated clinic. To bring him/her to the hospital, avoid using public transportation, wear a surgical mask and fill in the appropriate self-declaration
- ✚ in the event that your baby has signs/symptoms suggestive for an infection (difficulty of feeding, hyporeactivity, sneezing, cough, fever), talk to your pediatrician or call the hospital ward at the number provided in the discharge letter
